1

## 2 **Prevalence of Microvascular Complications and Associated Risk Factors**

### 3 **among Diabetes Mellitus Patients attending Nyeri County Referral**

#### 4 **Hospital, Kenya: a cross-sectional Study**

##### 5 **Authors Names:**

6 Rachael Ireri <sup>1,2</sup>, Gideon Kikuvi <sup>1</sup>, Susan Mambo <sup>1</sup>, Besty Cheriro <sup>1</sup>.

##### 7 **Authors Affiliation:**

8 <sup>1</sup>Jomo Kenyatta University of Agriculture and Technology.

9 <sup>2</sup>Department of Clinical Medicine Kenya Medical Training College

10 Corresponding Author: Rachael Ireri ([irerirachaelw@yahoo.com](mailto:irerirachaelw@yahoo.com))

##### 11 **Abstract**

12 Microvascular complications are one of the major causes of morbidity and mortality  
13 worldwide among patients with diabetes mellitus (DM). In Kenya, Nyeri County has  
14 the highest prevalence of diabetes mellitus compared to other counties. More than  
15 50% of Nyeri County Referral Hospital (NCRH) admissions result from non-  
16 communicable diseases (NCDs) and over 55% of hospital deaths are attributable to  
17 NCDs. This study therefore sought to assess the prevalence of microvascular  
18 complications and the associated risk factors among patients attending Nyeri County  
19 Referral Hospital in Kenya.

20 A hospital-based cross-sectional study was conducted on 314 DM patients on follow-  
21 up at NCRH from August 2022 to October 2022. The socio-demographic,  
22 anthropometric, biochemical, and clinical data were recorded using a structured  
23 survey. All the recruited patients underwent an extensive examination for the presence  
24 of Microvascular complications like neuropathy, retinopathy, and nephropathy. Data  
25 were analyzed using STATA version 17. Univariate and multivariate logistic regression

**NOTE: This preprint reports new research that has not been certified by peer review and should not be used to guide clinical practice.**

26 analyses are used to determine the risk factors associated with Microvascular  
27 complications of DM.

28 Among the 314 patients with DM, 58% were women. The overall prevalence of  
29 Microvascular complications (MVCs) is 36.62%. Diabetic peripheral neuropathy was  
30 the most frequent complication (27.4%), followed by retinopathy (10.8%) and  
31 nephropathy (8%). Inadequate physical exercise was a risk factor for all MVCs. Age,  
32 marital status, and level of education were risk factors for neuropathy while smoking  
33 and alcohol intake were risk factors for nephropathy. Additionally marital status was  
34 a risk factor for retinopathy. Further, the analysis revealed the risk of non-smokers  
35 getting neuropathy reduced by 98% compared to smokers (P=0.0001; CI 0.003058-  
36 0.191502). lack of regular physical exercise was significantly associated with  
37 retinopathy (P 0.012; CI 0.046816-0.690638).

38 One in ten patients with DM had a microvascular complication. The benefits of  
39 microvascular complications prevention should thus be factored into the management  
40 of patients with diabetes mellitus.

41 **Keywords:** Diabetes mellitus, microvascular complications, Risk factors,  
42 retinopathy, neuropathy, nephropathy.

### 43 **Introduction**

44 Diabetes mellitus is a growing global epidemic that disproportionately affects  
45 economic and health outcomes in low- and middle-income countries (LMICS) (1). DM  
46 is the most common type of diabetes, accounting for around 90% of all diabetes  
47 worldwide (2) Diabetic complications are usually divided into two main categories,  
48 Macrovascular, and Microvascular complications. Microvascular complications  
49 include diabetes retinopathy, nephropathy, and neuropathy (3).

50 Microvascular complications such as Diabetes retinopathy, nephropathy and  
51 peripheral neuropathy are most common complications in diabetes. The global

52 prevalence of this Microvascular complications varies considerably. This is  
53 attributable to the population characteristics, screening and treatment methods used  
54 in different regions (4).

55 Diabetes peripheral neuropathy is the most common Microvascular complication  
56 across all the regions. Globally the prevalence it is estimated to be 18.8%, while Africa  
57 has a prevalence of 14.5% (5). The prevalence of DR is estimated to be 35%; out of this  
58 12% are at risk of losing eye sight. Likewise, between 10% and 67% of patients with  
59 different levels of renal failure and renal disease is attributed to diabetes. More than  
60 80% of end-stage renal disease (ESRD) is caused by diabetes (2).

61 The African Region has the highest predicted increase in the number of diabetes cases  
62 by 48% and 143% in year 2030 and 2045 respectively. In 2019, 6.8% of mortality was  
63 attributable to diabetes with majority of deaths reported in people below 60 years of  
64 age. Of the total number of deaths attributable to diabetes, large proportions occur in  
65 low- and middle-income countries (41.8% and 58.2%, respectively. It is also estimated  
66 (3.9%) 19.4 million adults aged 20–79 years have diabetes. However, more than half  
67 (59.7%) of the people living with diabetes are undiagnosed and this could be the reason  
68 of low prevalence in the region. Out of 19.4 million reported diabetes cases 8.8% are  
69 aged between 65-69 years. Moreover, 5.9% and 2.4% live in urban and rural areas  
70 respectively (2).

71 About 2.4% of Kenyan population are diabetic, 3.1% are pre-diabetic and a substantial  
72 proportion of 52.8% people with undiagnosed diabetes are at risk of developing  
73 complications. Only 21.3 % of the patients with diabetes reported to be on treatment.  
74 Glycemic control was achieved in 7% of the patients on treatment (6). This low  
75 glycemic control levels could result to development of complications and premature  
76 deaths. The burden of non-communicable diseases continues to increase in Nyeri  
77 County having a diabetes prevalence of 6.4% which is almost triple of national

78 prevalence. Almost a half of deaths are due to NCDs i.e. two out of three deaths.  
79 Besides, the prevalence of CKD stages 3 to 5 in this adult population who are above 30  
80 years, with type 2 diabetes, is 39.0% (7). As the prevalence of diabetes continues to rise  
81 and the burden of diabetic Microvascular complications will increase in future, People  
82 with diabetes have an increased risk of developing Microvascular complications,  
83 which, if undetected or left untreated, can have a devastating impact on quality of life  
84 and place a significant burden on health care costs (8).  
85 Therefore, this study aims to assess the prevalence of diabetes Microvascular  
86 complications and associated risk factors among diabetes mellitus patients attending  
87 Nyeri County Referral Hospital, Kenya.

## 88 **Methodology**

### 89 **Study design and setting**

90 A hospital-based cross-sectional study was conducted from 08<sup>th</sup> August 2022 to 31<sup>st</sup>  
91 October 2022 in Nyeri County Referral Hospital in the Diabetic Clinic and Diabetes  
92 Outpatient Clinic (DOPC). The diabetes clinic runs every day except weekends and  
93 public holiday while the DOPC only runs only of Friday. Both clinics provides all  
94 essential general healthcare services to DM patients.

### 95 **Study participants**

96 The study recruited diabetes patients aged at least 18 years on follow-up and treatment  
97 for at least six months in Nyeri County Referral Hospital in the Diabetic Clinic or  
98 Diabetes Outpatient Clinic (DOPC). Participants with a complete follow-up and  
99 management documentation in the file were included. participants excluded from the  
100 study include those with gestational diabetes, those unstable and required urgent  
101 referral and evidence of impaired cognitive function. All the Participants provided  
102 informed consent prior to their inclusion in the study.

103

104

## 105 **Data Sources and measurements**

106 Data was collected from all eligible and consenting participants using a validated  
107 researcher administered semi structured questionnaire to collect data on socio-  
108 demographic, characteristics and various risk factors. The information collected from  
109 the subjects mainly included socio-demographic characteristics (such as age, gender,  
110 marital status, education, monthly income, social security, locality type, and ethnicity)  
111 and bio-clinical information (such as disease duration, treatment, physical activity,  
112 systolic and diastolic blood pressure, waist circumference, body mass index (BMI),  
113 biochemical parameters, and presence of complications). Standard and validated  
114 protocols were used to classify various biochemical parameters. Details of co-  
115 morbidities were obtained from their records as well as from history. Further all the  
116 participants were examined for presence of neuropathy, retinopathy and neuropathy.

## 117 **Sample size**

118 sample size was calculated using the Cochran's formula for single population  
119 proportion. The prevalence of reported neuropathy, retinopathy and nephropathy in  
120 other areas in Kenya is 41, 33 and 0.9% respectively. Based on this finding from  
121 previous studies 41% prevalence rate (p) of diabetic neuropathy complication was used  
122 in margin of error (d 0.05); and 95% confidence interval. Since the target population  
123 was below 10,000 a finite correction formula was applied to get a working sample size  
124 of 314 participants. Systemic random sampling was used to collect data from the  
125 patients; where the first subject was selected randomly and then every sixth subject  
126 was selected for the study till sample size was achieved.

## 127 **Data analysis**

128 Data collected was entered and analyzed using STATA Version 17. Descriptive  
129 statistics such as mean, frequency, percentages, means and standard deviation was

130 computed for continuous and categorical variables. Chi-square test was used in  
131 analysis of categorical variables to test for associations between independent and  
132 dependent variables of the subjects. Significant variables from Univariate analysis  
133 were analyzed further using binary logistic regression and binomial logistic regression  
134 to determine the association of independent risk factors with diabetes Microvascular  
135 complications. Results were expressed as odds ratios (OR) and 95% confidence  
136 intervals (CI). A p-value of < 5% is considered statistically significant.

### 137 **Ethics statement**

138 Both written and verbal informed consent for participation was also obtained from all  
139 the participants. For written consent all participants signed the consent form in the  
140 questionnaire. Verbal consent was witnessed by the nurse or clinical officer in-charge  
141 of the clinic. The study was approved by the Ethical Review Committee of Jomo  
142 Kenyatta University of Agriculture and Technology, the National Commission for  
143 Science, Technology and Innovation (NACOSTI/P/22/18990) and the County  
144 Director of Health Services in Nyeri County.

### 145 **Results**

#### 146 **Socio-demographic characteristics of the study participants**

147 Among 314 T2DM patients who participated in this study, 58 % were females, and 42%  
148 were males. The participants' average age was 58.49.  $\pm$  17.43 years and 66.6% were  
149 married. More than half of the subjects (90.5%) had attained primary education. Of all  
150 the subjects in the study, 79% were rural residents (Table 1).

| Variable         | Description | Freq, N (%) |
|------------------|-------------|-------------|
| Follow Up Clinic | DOPC        | 155(49.4)   |
|                  | DM Clinic   | 159(50.6)   |
| Age Group        | <=30 Years  | 26(8.3)     |
|                  | 31-45 Years | 42(13.4)    |
|                  | 46-60 Years | 90(28.7)    |
|                  | >=61 Years  | 156(49.7)   |
| Gender           | Male        | 132(42)     |

| Table 1: socio demographic characteristics of patients with MVCs |                     |             |
|------------------------------------------------------------------|---------------------|-------------|
| Variable                                                         | Description         | Freq, N (%) |
|                                                                  | Female              | 182(58)     |
| Marital Status                                                   | Married             | 209(66.6)   |
|                                                                  | Single              | 43(13.7)    |
|                                                                  | Divorced/Separated  | 12(3.8)     |
|                                                                  | Widowed             | 50(15.9)    |
| Religion                                                         | Christian           | 311(99)     |
|                                                                  | Muslim              | 2(0.6)      |
|                                                                  | Hinduism            | 1(0.3)      |
| Level Of Education                                               | Primary             | 158(50.3)   |
|                                                                  | Secondary           | 90(28.7)    |
|                                                                  | Tertiary            | 36(11.5)    |
|                                                                  | None                | 30(9.6)     |
| Occupation                                                       | Government Employee | 7(2.2)      |
|                                                                  | Private Employment  | 19(6.1)     |
|                                                                  | Business            | 52(16.6)    |
|                                                                  | Farmer              | 183(58.3)   |
|                                                                  | Unemployed          | 53(16.9)    |
| Residence                                                        | Rural               | 248(79)     |
|                                                                  | Urban               | 66(21)      |
| Ethnicity                                                        | Kikuyu              | 294(93.6)   |
|                                                                  | Embu                | 9(2.9)      |
|                                                                  | Meru                | 4(1.3)      |
|                                                                  | Others              | 7(2.2)      |
| Income                                                           | Less Than 5000      | 183(58.3)   |
|                                                                  | 5001-10000          | 64(20.4)    |
|                                                                  | 10001-15000         | 29(9.2)     |
|                                                                  | 15001-20000         | 12(3.8)     |
|                                                                  | 20001-25000         | 12(3.8)     |
|                                                                  | Above 25001         | 14(4.5)     |

151 **Prevalence of Diabetes Microvascular complications and distribution of**  
152 **prevalence by demographic characteristics**

153 The overall prevalence of microvascular complications (MVCs) is 36.62%. Peripheral  
154 neuropathy was the most common complication affecting 86(27.4%) of the  
155 participants; while retinopathy was at 34(10.8%) and nephropathy was the least  
156 25(8%). Majority of the respondents with diabetic neuropathy complications were  
157 from the DOPC 49(31.6%) and more common among those aged  $\geq 61$  years  
158 56(35.9%). More than half 16 (53.3%) of the respondents with diabetic neuropathy had  
159 no formal education.

160 Diabetic nephropathy complication majorly affected 14(9%) of individuals from the  
161 DOPC clinic. It was most common among those aged  $\geq 61$  years 18(11.5%) and males  
162 were more affected 14(10.6%). Additionally, respondents with no formal education



163 and those with rural residence were more affected at 5(16.7%) and 22(8.9%)  
 164 respectively. DOPC clinic recorded more patients 23(14.8%) with diabetic retinopathy.  
 165 Retinopathy complication was most common among those aged  $\geq 61$  years 21(13.5.  
 166 %) and least common 1(4%) amongst those aged  $\leq 30$  years. Diabetic retinopathy was  
 167 most prevalent 4(21.1%) among those in private employment compared to government  
 168 employees who reported zero prevalence (Table 2).

*Table 2: Prevalence of Diabetes Microvascular complications and distribution of prevalence by demographic characteristics*

| Characteristic Variable     | Total (N)           |                    | Overall prevalence (%)                                    |                 |                 |
|-----------------------------|---------------------|--------------------|-----------------------------------------------------------|-----------------|-----------------|
|                             | 314                 |                    | 36.62                                                     |                 |                 |
|                             |                     |                    | Neuropathy (%)                                            | Nephropathy (%) | Retinopathy (%) |
| Microvascular complications | 314                 |                    | 86 (27.4%)                                                | 25 (8.0%)       | 34 (10.8%)      |
|                             |                     | Total participants | Distribution of Prevalence by Demographic characteristics |                 |                 |
| Follow Up Clinic            | DOPC                | 155                | 49(31.6%)                                                 | 14(9%)          | 23(14.8%)       |
|                             | DM Clinic           | 159                | 37(23.3%)                                                 | 11(6.9%)        | 11(6.9%)        |
| Age Group                   | $\leq 30$ Years     | 26                 | 1(4%)                                                     | 2(8%)           | 1(4%)           |
|                             | 31-45 Years         | 42                 | 8(19%)                                                    | 3(7.1%)         | 4(9.5%)         |
|                             | 46-60 Years         | 90                 | 21(23.3%)                                                 | 2(2.2%)         | 8(8.9%)         |
|                             | $\geq 61$ Years     | 156                | 56(35.9%)                                                 | 18(11.5%)       | 21(13.5%)       |
| Gender                      | Male                | 132                | 33(25%)                                                   | 14(10.6%)       | 10(7.6%)        |
|                             | Female              | 182                | 53(29.1%)                                                 | 11(6%)          | 24(13.2%)       |
| Marital Status              | Married             | 209                | 57(27.3%)                                                 | 14(6.7%)        | 23(11%)         |
|                             | Single              | 43                 | 5(11.6%)                                                  | 2(4.7%)         | 1(2.3%)         |
|                             | Divorced/Separated  | 12                 | 1(10%)                                                    | 1(10%)          | 0(0%)           |
|                             | Widowed             | 50                 | 23(46%)                                                   | 8(16%)          | 10(20%)         |
| Religion                    | Christian           | 311                | 85(27.3%)                                                 | 25(8%)          | 34(10.9%)       |
|                             | Muslim              | 2                  | 1(50%)                                                    | 0(0%)           | 0(0%)           |
|                             | Hinduism            | 1                  | 0(0%)                                                     | 0(0%)           | 0(0%)           |
| Education                   | Primary             | 158                | 42(26.6%)                                                 | 15(9.5%)        | 16(10.1%)       |
|                             | Secondary           | 90                 | 21(23.3%)                                                 | 3(3.3%)         | 6(6.7%)         |
|                             | Tertiary            | 36                 | 7(19.4%)                                                  | 2(5.6%)         | 6(16.7%)        |
|                             | None                | 30                 | 16(53.3%)                                                 | 5(16.7%)        | 6(20%)          |
| Occupation                  | Government Employee | 7                  | 0(0%)                                                     | 0(0%)           | 0(0%)           |
|                             | Private Employment  | 19                 | 7(36.8%)                                                  | 0(0%)           | 4(21.1%)        |
|                             | Business            | 52                 | 15(28.8%)                                                 | 5(9.6%)         | 4(7.7%)         |
|                             | Farmer              | 183                | 50(27.3%)                                                 | 12(6.6%)        | 19(10.4%)       |
|                             | Unemployed          | 53                 | 14(26.4%)                                                 | 8(15.1%)        | 7(13.2%)        |
| Residence                   | Rural               | 248                | 71(28.6%)                                                 | 22(8.9%)        | 27(10.9%)       |
|                             | Urban               | 66                 | 15(22.7%)                                                 | 3(4.5%)         | 7(10.6%)        |



169 **Risk factors associated with diabetes retinopathy, nephropathy and**  
 170 **neuropathy**

171 physical exercise, age cohort, marital status and level of education had a significant  
 172 relationship with neuropathy complications were with p values of 0.002, 0.001, 0.002  
 173 and 0.007 respectively. A significant relationship exists between nephropathy  
 174 complications and smoking, history of alcohol intake, physical exercise and HBIAC  
 175 test with p values of 0.001, 0.001, 0.0002 and 0.011 respectively. 0.002, 0.001, 0.002  
 176 and 0.007 respectively. Additionally, a significant relationship with retinopathy  
 177 complications were physical exercise and marital status with p values of 0.013 and  
 178 0.033 respectively (Table 3).

Table 3: Risk factors associated with diabetes retinopathy, nephropathy and neuropathy among diabetes mellitus patients

| Variable                  | Variable choices    | Type of Complication and P Value |         |                        |         |                        |         |
|---------------------------|---------------------|----------------------------------|---------|------------------------|---------|------------------------|---------|
|                           |                     | Neuropathy Yes, n (%)            | P value | Nephropathy Yes, n (%) | P value | Retinopathy Yes, n (%) | P value |
| BMI                       | Normal              | 37(29.6)                         | 0.236   | 10(%yes)               | 0.63    | 15(12)                 | 0.86    |
|                           | Under weight        | 0(0)                             |         | 0(0)                   |         | 0(0)                   |         |
|                           | Over weight         | 40(29.9)                         |         | 13(9.7)                |         | 15(11.2)               |         |
|                           | Obese               | 9(17.6)                          |         | 2(3.9)                 |         | 4(7.8)                 |         |
| Smoke                     | Yes                 | 3(17.6)                          | 0.267   | 5(29.4)                | 0.00    | 0(0)                   | 0.23    |
|                           | No                  | 83(27.9)                         |         | 20(6.7)                |         | 34(11.4)               |         |
| history of alcohol intake | Yes                 | 4(23.5)                          | 0.481   | 5(29.4)                | 0.00    | 1(5.9)                 | 0.70    |
|                           | No                  | 82(27.6)                         |         | 20(6.7)                |         | 33(11.1)               |         |
| physical exercise         | Yes                 | 62(23.8)                         | 0.002   | 15(5.8)                | 0.00    | 23(8.8)                | 0.01    |
|                           | No                  | 24(44.4)                         |         | 10(18.5)               |         | 11(20.4)               |         |
| age group                 | <=30 years          | 1(3.8)                           | 0.001   | 2(7.7)                 | 0.07    | 1(3.8)                 | 0.49    |
|                           | 31-45 years         | 8(19)                            |         | 3(7.1)                 |         | 4(9.5)                 |         |
|                           | 46-60 years         | 21(23.3)                         |         | 2(2.2)                 |         | 8(8.9)                 |         |
|                           | >=61 years          | 56(35.9)                         |         | 18(11.5)               |         | 21(13.5)               |         |
| Gender                    | Male                | 33(25)                           | 0.249   | 14(10.6)               | 0.14    | 10(7.6)                | 0.114   |
|                           | Female              | 53(29.1)                         |         | 11(6)                  |         | 24(13.2)               |         |
| marital status            | Married             | 57(27.3)                         | 0.002   | 14(6.7)                | 0.142   | 23(11)                 | 0.03    |
|                           | Single              | 5(11.6)                          |         | 2(4.7)                 |         | 1(2.3)                 |         |
|                           | Divorced/separated  | 1(8.3)                           |         | 1(10)                  |         | 0(0)                   |         |
|                           | Widowed             | 23(46)                           |         | 8(16)                  |         | 10(20)                 |         |
| level of education        | Primary             | 42(26.6)                         | 0.007   | 15(9.5)                | 0.07    | 16(10.1)               | 0.134   |
|                           | secondary           | 21(23.3)                         |         | 3(3.3)                 |         | 6(6.7)                 |         |
|                           | Tertiary            | 7(19.4)                          |         | 2(5.6)                 |         | 6(16.7)                |         |
|                           | None                | 16(53.3)                         |         | 5(16.7)                |         | 6(20)                  |         |
| employment status         | government employee | 0(0)                             | 0.497   | 0(0)                   | 0.20    | 0(0)                   | 0.48    |
|                           | Private             | 7(36.8)                          |         | 0(0)                   |         | 4(21.1)                |         |
|                           | Business            | 15(28.8)                         |         | 5(9.6)                 |         | 4(7.7)                 |         |
|                           | Farmer              | 50(27.3)                         |         | 12(6.6)                |         | 19(10.4)               |         |
|                           | Unemployed          | 14(26.4)                         |         | 8(15.1)                |         | 7(13.2)                |         |

Table 3: Risk factors associated with diabetes retinopathy, nephropathy and neuropathy among diabetes mellitus patients

| Variable          | Variable choices                  | Type of Complication and P Value |         |                        |         |                        |         |
|-------------------|-----------------------------------|----------------------------------|---------|------------------------|---------|------------------------|---------|
|                   |                                   | Neuropathy Yes, n (%)            | P value | Nephropathy Yes, n (%) | P value | Retinopathy Yes, n (%) | P value |
| current treatment | Metformin 500mg                   | 17(24.6)                         | 0.784   | 2(2.9)                 | 0.191   | 12(17.4)               | 0.141   |
|                   | Metformin 500mg and Glibenclamide | 8(28.6)                          |         | 2(7.1)                 |         | 1(3.6)                 |         |
|                   | Metformin 850/1000mg              | 28(29.5)                         |         | 7(7.4)                 |         | 11(11.6)               |         |
|                   | Metformin+Glibenclamide+Insulin   | 20(31.7)                         |         | 5(7.9)                 |         | 8(12.7)                |         |
|                   | Insulin only                      | 13(22.8)                         |         | 9(15.8)                |         | 2(3.5)                 |         |
|                   | Others                            | 0(0)                             |         | 0(0)                   |         | 0(0)                   |         |
| HBIAC Test        | Normal                            | 37(29.6)                         | 0.475   | 4(3.2)                 | 0.011   | 17(13.6)               | 0.199   |
|                   | Abnormal                          | 49(25.9)                         |         | 21(11.1)               |         | 17(9)                  |         |

179 **Regression analysis for risk factors for diabetes Microvascular**

180 **complications**

181 Controlling for frequency of exercise, marital status and level of education; age  
 182 cohorts were not significantly associated with neuropathic complications. Similarly  
 183 holding age cohorts, frequency of exercise and level of education constant, marital  
 184 status were not significantly associated with neuropathic complications (Table 4).

Table 4: Regression analysis for risk factors for diabetic neuropathy

| Complication Neuropathy            | Odds Ratio | Std. Err. | Z     | P>z   | [95% Conf. Interval] |          |
|------------------------------------|------------|-----------|-------|-------|----------------------|----------|
| Age cohorts (Base-<=30years)       |            |           |       |       |                      |          |
| <=30 years                         | 1          | (base)    |       |       |                      |          |
| 31-45 years                        | 0.452414   | 0.243326  | -1.47 | 0.14  | 0.157662             | 1.298211 |
| 46-60 years                        | 0.730886   | 0.26773   | -0.86 | 0.392 | 0.35649              | 1.498484 |
| >=61 years                         | 1          | (omitted) |       |       |                      |          |
| marital status (Base-Married)      |            |           |       |       |                      |          |
| Single                             | 0.832651   | 0.509795  | -0.3  | 0.765 | 0.25079              | 2.764494 |
| Divorced/Separated                 | 0.376244   | 0.410275  | -0.9  | 0.37  | 0.044389             | 3.189042 |
| Widowed                            | 1.489481   | 0.647433  | 0.92  | 0.359 | 0.635394             | 3.49162  |
| level of education (Base-Primary)  |            |           |       |       |                      |          |
| Secondary                          | 1.383951   | 0.517554  | 0.87  | 0.385 | 0.664965             | 2.880334 |
| Tertiary                           | 1.182695   | 0.65043   | 0.31  | 0.76  | 0.402485             | 3.475331 |
| None                               | 1.893705   | 1.055392  | 1.15  | 0.252 | 0.63522              | 5.645478 |
| Frequency of exercise (Base-Daily) |            |           |       |       |                      |          |
| Once weekly                        | 0.811892   | 0.360899  | -0.47 | 0.639 | 0.339724             | 1.940308 |
| 2-3 times a week                   | 0.536864   | 0.204653  | -1.63 | 0.103 | 0.254323             | 1.133295 |
| 2 weeks to one month               | 1          | (empty)   |       |       |                      |          |
| Only when recommended by HC person | 0.767539   | 0.928569  | -0.22 | 0.827 | 0.071667             | 8.220229 |
| _cons                              | 0.522596   | 0.205271  | -1.65 | 0.099 | 0.242003             | 1.128524 |

186 Holding for age cohorts, frequency of exercise and level of education, the odds of those  
187 who are not smoking getting nephropathy reduces by 98% compared to smokers (P  
188 0001; CI 0.003058-0.191502) (Table 5).

189

190

191 Adjusting for marital status, the odds of those who do exercise once weekly getting

Table 5: Regression analysis for risk factors for diabetic nephropathy

| Complication Nephropathy           | Odds Ratio | Std. Err. | Z     | P>z    | [95% Conf. Interval] |          |
|------------------------------------|------------|-----------|-------|--------|----------------------|----------|
| Age cohorts (Base-<=30years)       |            |           |       |        |                      |          |
| <=30                               | 1          | (base)    |       |        |                      |          |
| 31-45                              | 1          | (empty)   |       |        |                      |          |
| 46-60                              | 0.22572    | 0.430797  | -0.78 | 0.435  | 0.005358             | 9.508858 |
| >=61                               | 4.504898   | 7.633377  | 0.89  | 0.374  | 0.162688             | 124.7422 |
| Frequency of exercise (Base-Daily) |            |           |       |        |                      |          |
| Once weekly                        | 4.175531   | 4.012703  | 1.49  | 0.137  | 0.634897             | 27.46123 |
| 2-3 times a week                   | 0.68741    | 0.649369  | -0.4  | 0.692  | 0.107924             | 4.378367 |
| 2 weeks to one month               | 1          | (empty)   |       |        |                      |          |
| Only when recommended by HC person | 1          | (empty)   |       |        |                      |          |
| level of education (Base-Primary)  |            |           |       |        |                      |          |
| Secondary                          | 0.277528   | 0.328682  | -1.08 | 0.279  | 0.02724              | 2.827485 |
| Tertiary                           | 1.612873   | 1.707157  | 0.45  | 0.652  | 0.2026               | 12.83987 |
| None                               | 0.568066   | 0.574989  | -0.56 | 0.576  | 0.078131             | 4.130236 |
| Smoking (Base-Yes)                 |            |           |       |        |                      |          |
| No                                 | 0.024201   | 0.025541  | -3.53 | 0.0001 | 0.003058             | 0.191502 |
| hb1ac                              | 2.217372   | 1.664154  | 1.06  | 0.289  | 0.509338             | 9.653207 |
| _cons                              | 0.38589    | 0.624194  | -0.59 | 0.556  | 0.016204             | 9.190042 |

192 retinopathy complication reduces by 83% compared to those who do exercise daily (P  
193 0.012; CI 0.046816-0.690638). Controlling for marital status, the odds of those who  
194 do exercise 2-3 times a week reduces by 87% compared to those who do exercise daily  
195 (P 0.0001; CI 0.049133-0.397895) (Table 6).

Table 6: Regression analysis for risk factors for diabetic Retinopathy

| Complication Retinopathy           | Odds Ratio | Std. Err. | z     | P>z    | [95% Conf. Interval] |          |
|------------------------------------|------------|-----------|-------|--------|----------------------|----------|
| Frequency of exercise (Base-Daily) |            |           |       |        |                      |          |
| Once weekly                        | 0.179814   | 0.123459  | -2.5  | 0.012  | 0.046816             | 0.690638 |
| 2-3 times a week                   | 0.139821   | 0.074608  | -3.69 | 0.0001 | 0.049133             | 0.397895 |

|                                                               |                 |                 |              |              |               |                 |
|---------------------------------------------------------------|-----------------|-----------------|--------------|--------------|---------------|-----------------|
| 2 weeks to one month<br>Only when recommended by HC<br>person | 2.87246         | 4.190182        | 0.72         | 0.469        | 0.164653      | 50.11164        |
|                                                               | 1               | (empty)         |              |              |               |                 |
| <hr/>                                                         |                 |                 |              |              |               |                 |
| marital status (Base-Married)                                 |                 |                 |              |              |               |                 |
| <hr/>                                                         |                 |                 |              |              |               |                 |
| Married                                                       | 1               | (base)          |              |              |               |                 |
| Single                                                        | 0.149677        | 0.160029        | -1.78        | 0.076        | 0.018411      | 1.216815        |
| Divorced/Separated                                            | 1               | (empty)         |              |              |               |                 |
| Widowed                                                       | 1.599709        | 0.933347        | 0.81         | 0.421        | 0.509811      | 5.019643        |
| <u>_cons</u>                                                  | <u>0.348134</u> | <u>0.124519</u> | <u>-2.95</u> | <u>0.003</u> | <u>0.1727</u> | <u>0.701779</u> |

196

## 197 **Discussion**

198 The current study sought to assess the prevalence of and the associated risk factors  
 199 among patients attending Nyeri County Referral Hospital in Kenya. The study  
 200 observed that overall prevalence of microvascular complications is 36.62%. Among the  
 201 microvascular complications, peripheral neuropathy had the highest prevalence  
 202 (27.4%) followed by retinopathy (10.8%) and nephropathy (8 %). These findings are  
 203 similar to findings from studies other studies conducted in other low income countries  
 204 such as Ethiopia, Tanzania and India (9–11). However, this findings might differ in  
 205 specific percentage of proportions the difference might be related to accessibility and  
 206 advancement of health institutions and patient’s adherence to medication and  
 207 practice in different regions.

208 Univariate analysis showed that factors such as lower education, occupation i.e.  
 209 farmers and patient who resided in the rural areas were significantly associated with  
 210 peripheral neuropathy ( $P < .05$ ). Lower level of education, unemployment, smoking  
 211 and patients who resided in the rural areas were significantly associated with  
 212 nephropathy ( $P < .05$ ) whereas lower education, frequency of exercise and private  
 213 employment were significantly associated with retinopathy ( $P < .05$ ). All the three  
 214 MVCs prevalence was higher in patients seen in the Diabetes outpatient clinic (DOPC)  
 215 when compared to patients seen in the diabetes clinic. The high prevalence in DOPC

216 could be due to delay in diagnosis, poor self-care, poor health-seeking behavior as the  
217 clinic runs only once per week and patients are given appointment of up to 3 months  
218 while the other clinic runs daily and patients are likely are given a nearer return date.  
219 Lower education status was an independent and commonly encountered risk factors  
220 for all the MVCs. Educational status influences the awareness about diabetes,  
221 compliance to drugs and the health seeking behavior of an individual. Studies have  
222 observed that lower the education higher is the risk of developing diabetes  
223 complications. Agriculture is the major occupation in rural areas in Kenya. Farmers  
224 are more prone to foot injuries during work this could be reason for high prevalence  
225 of neuropathy (10,12).

226 The presence of DPN and Nephropathy was associated with rural sector of residence  
227 and lower household income. A possible explanation for the occurrence could be that  
228 poor people are less likely to use health services, which might result in delayed  
229 diagnosis and poor control of DM. Previous studies have reported that metabolic  
230 control of DM was worse in patients with a lower socio-economic status. In addition,  
231 the increased risk in rural sector residents could be due to lack of access to the better  
232 health care facilities available to residents in urban areas (13).

233 Multi-regression analysis revealed that the risk of diabetic Retinopathy reduces by  
234 87% in those who do exercise 2-3 times a week compared to those who do exercise  
235 daily (P 0.0001; CI 0.049133-0.397895. Even though there is strong evidence for the  
236 correlation between physical activity and disease status, the number of people who  
237 actually partake in the minimum requirement for physical activity as prescribed by the  
238 American College of Sports of Medicine (ACSM) and other Public Health and Exercise  
239 Authorities remains low around the world. Physical activity (PA) is a critical  
240 component of lifestyle intervention in diabetes management. This study agrees with

241 other studies which revealed that total physical activity was decreased in patients with  
242 severe to very severe non-proliferative and proliferative diabetic retinopathy (14,15)  
243 Adjusting for age cohorts, frequency of exercise and level of education, the odds of  
244 those who are not smoking getting nephropathy reduces by 98% compared to smokers  
245 (P=0.0001; CI 0.002549-0.145117). Smoking, a well-known and preventable risk factor  
246 for many diseases. Cigarette smoking in diabetes has been repeatedly confirmed as an  
247 independent risk factor for the onset and progression of diabetic nephropathy. This  
248 study demonstrates strong association found between chronic cigarette smoking and  
249 diabetic nephropathy. This is consistent with various studies that suggest; smoking is  
250 a major fuel in the development of high oxidative stress and subsequently  
251 hyperlipidemia, accumulation of advanced glycation end products, activation of the  
252 renin angiotensin system and Rho-kinase, which are observed to play a pathogenic  
253 role in the progression of diabetic nephropathy. Furthermore, cigarette smoking in  
254 diabetic patients with vascular complications produces a variety of pathological  
255 changes in the kidney, such as thickening of the glomerular basement membrane and  
256 mesangial expansion with progression in glomerulus sclerosis and interstitial fibrosis,  
257 which ultimately results in end stage renal failure (16,17)

### 258 **Study Limitations**

259 This study is a cross-sectional study hence cannot establish causal inferences but  
260 rather associations. Interpretation of findings should therefore be done cautiously.  
261 Nonetheless, this study provides some estimates on the prevalence of MVCs and  
262 associated risk factors among DM patients inform development of interventions. The  
263 sample size of 314 is also large enough to draw valid conclusions from a single center  
264 study.

265

266

## 267 **Conclusion**

268 In this study, four in ten patients with DM had a microvascular complication. Three in  
269 ten had a neuropathy and two in ten had a retinopathy. Factors such as physical  
270 activity, dietary practice, level of education, clinic where followed-up and area of  
271 residence being associated with the MVCs. Identifying patients at risk of MVCs can  
272 lead to targeted interventions in line with the Kenyan government NCD policy and  
273 SDG 3.4 target on reducing premature mortality from NCDs through prevention and  
274 treatment. Additionally, public health efforts should institute measures to ensure that  
275 health promotion and education on long-term diseases like DM form part of the  
276 routine management and care practices.

## 277 **Acknowledgments**

278 The authors would like to thank the study facilities and participants for their role in  
279 this study as well as clinicians in the DOPC and DM clinic for their support

## 280 **Authors' contribution**

281 Rachael Ileri conceptualized the study, designed the study, collected and analysed  
282 data, interpreted data, prepared and the reviewed manuscript for the final submission.  
283 Gideon Kikuvi, Susan Mambo and Besty Cheriro formulated research question and  
284 assisted and validated the manuscript for the final submission

## 285 **Competing interests**

286 The authors declare no competing interests.

287 **Financial support:** This work was not funded

## 288 **References**

- 289 1. Stanifer JW, Cleland CR, Makuka GJ, Egger JR, Maro V, Maro H, et al.  
290 Prevalence, Risk Factors, and Complications of Diabetes in the Kilimanjaro  
291 Region: A Population-Based Study from Tanzania. PLoS One [Internet]. 2016  
292 Oct 1 [cited 2023 Mar 6];11(10). Available from: [/pmc/articles/PMC5053499/](#)



- 293 2. Sun H, Saeedi P, Karuranga S, Pinkepank M, Ogurtsova K, Duncan BB, et al.  
294 IDF Diabetes Atlas: Global, regional and country-level diabetes prevalence  
295 estimates for 2021 and projections for 2045. *Diabetes Res Clin Pract.* 2022 Jan  
296 1;183.
- 297 3. Cheema S, Maisonneuve P, Zirie M, Jayyousi A, Alrouh H, Abraham A, et al.  
298 Risk factors for microvascular complications of diabetes in a high-risk middle  
299 east population. *J Diabetes Res.* 2018;2018.
- 300 4. Saeedi P, Petersohn I, Salpea P, Malanda B, Karuranga S, Unwin N, et al.  
301 Global and regional diabetes prevalence estimates for 2019 and projections for  
302 2030 and 2045: Results from the International Diabetes Federation Diabetes  
303 Atlas, 9th edition. *Diabetes Res Clin Pract.* 2019 Nov 1;157.
- 304 5. Kosiborod M, Gomes MB, Nicolucci A, Pocock S, Rathmann W, Shestakova M  
305 V., et al. Vascular complications in patients with type 2 diabetes: Prevalence  
306 and associated factors in 38 countries (the DISCOVER study program).  
307 *Cardiovasc Diabetol.* 2018 Nov 28;17(1).
- 308 6. Mohamed SF, Mwangi M, Mutua MK, Kibachio J, Hussein A, Ndegwa Z, et al.  
309 Prevalence and factors associated with pre-diabetes and diabetes mellitus in  
310 Kenya: Results from a national survey. *BMC Public Health.* 2018 Nov 7;18.
- 311 7. Otieno FCF, Ogola EN, Kimando MW, Mutai K. The burden of unrecognised  
312 chronic kidney disease in patients with type 2 diabetes at a county hospital  
313 clinic in Kenya: Implications to care and need for screening. *BMC Nephrol.*  
314 2020 Feb 28;21(1).
- 315 8. Girach A, Manner D, Porta M. Diabetic microvascular complications: Can  
316 patients at risk be identified? A review. *Int J Clin Pract.* 2006  
317 Nov;60(11):1471–83.
- 318 9. Msanga D, Reis K, Kayange N, Bakalemwa R, Kidenya B, Hau D, et al. Diabetic

- 319 Microvascular Complications Among Children and Adolescents in  
320 Northwestern Tanzania: A Cross-Sectional Study. *Ann Glob Heal* [Internet].  
321 2020 [cited 2023 Feb 2];86(1). Available from: [/pmc/articles/PMC7181947/](https://pubmed.ncbi.nlm.nih.gov/39111111/)
- 322 10. Seid MA, Akalu Y, Gela YY, Belsti Y, Diress M, Fekadu SA, et al. Microvascular  
323 complications and its predictors among type 2 diabetes mellitus patients at  
324 Dessie town hospitals, Ethiopia. *Diabetol Metab Syndr* [Internet]. 2021 Dec 1  
325 [cited 2023 Feb 2];13(1):86. Available from: [/pmc/articles/PMC8369723/](https://pubmed.ncbi.nlm.nih.gov/36111111/)
- 326 11. Govindarajan Venguidesvarane A, Jasmine A, Varadarajan S, Shriram V,  
327 Muthuthandavan AR, Durai V, et al. Prevalence of Vascular Complications  
328 Among Type 2 Diabetic Patients in a Rural Health Center in South India. *J*  
329 *Prim Care Community Heal*. 2020;11.
- 330 12. Dégano IR, Marrugat J, Grau M, Salvador-González B, Ramos R, Zamora A, et  
331 al. The association between education and cardiovascular disease incidence is  
332 mediated by hypertension, diabetes, and body mass index. *Sci Rep* [Internet].  
333 2017 Dec 1 [cited 2023 Feb 2];7(1). Available from:  
334 <https://pubmed.ncbi.nlm.nih.gov/28959022/>
- 335 13. Katulanda P, Ranasinghe P, Jayawardena R, Constantine GR, Sheriff MHR,  
336 Matthews DR. The prevalence, patterns and predictors of diabetic peripheral  
337 neuropathy in a developing country. *Diabetol Metab Syndr* [Internet]. 2012  
338 [cited 2023 Feb 2];4(1):21. Available from: [/pmc/articles/PMC3408375/](https://pubmed.ncbi.nlm.nih.gov/21111111/)
- 339 14. AlQabandi Y, Nandula SA, Boddepalli CS, Gutlapalli SD, Lavu VK, Abdelwahab  
340 RAM, et al. Physical Activity Status and Diabetic Retinopathy: A Review.  
341 *Cureus J Med Sci* [Internet]. 2022 Aug 21 [cited 2023 Feb 2];14(8). Available  
342 from: [https://www.cureus.com/articles/106869-physical-activity-status-and-](https://www.cureus.com/articles/106869-physical-activity-status-and-diabetic-retinopathy-a-review)  
343 [diabetic-retinopathy-a-review](https://www.cureus.com/articles/106869-physical-activity-status-and-diabetic-retinopathy-a-review)
- 344 15. Yan X, Han X, Wu C, Shang X, Zhang L, He M. Effect of physical activity on

- 345           reducing the risk of diabetic retinopathy progression: 10-year prospective  
346           findings from the 45 and Up Study. PLoS One [Internet]. 2021 Jan 1 [cited  
347           2023 Feb 2];16(1). Available from: [/pmc/articles/PMC7808642/](#)
- 348   16.   Liao D, Ma L, Liu J, Fu P. Cigarette smoking as a risk factor for diabetic  
349           nephropathy: A systematic review and meta-analysis of prospective cohort  
350           studies. PLoS One [Internet]. 2019 Jul 1 [cited 2023 Feb 2];14(2):e0210213.  
351           Available from:  
352           <https://journals.plos.org/plosone/article?id=10.1371/journal.pone.0210213>
- 353   17.   Agarwal R. Smoking, oxidative stress and inflammation: Impact on resting  
354           energy expenditure in diabetic nephropathy. BMC Nephrol [Internet]. 2005  
355           Nov 22 [cited 2023 Feb 2];6(1):1–9. Available from:  
356           <https://bmcnephrol.biomedcentral.com/articles/10.1186/1471-2369-6-13>  
357
